# Supplementary material for: A Multipollutant Approach to Estimating Causal Effects of Air Pollution Mixtures on Overall Mortality in a Large, Prospective Cohort
Source: PubMed Central journal article supplement (PMC9148665; doi:10.1097/ede.0000000000001492), 2022-04-05

**eTable 1.** Distribution of the estimated annual pollutant exposures at baseline in LIFEWORK.

|                                                                     | Minimum | 25 <sup>th</sup><br>Percentile | Median | Mean  | 75 <sup>th</sup><br>percentile | Maximum |
|---------------------------------------------------------------------|---------|--------------------------------|--------|-------|--------------------------------|---------|
| NO <sub>2</sub> (µg/m <sup>3</sup> )                                | 8.87    | 19.07                          | 22.92  | 23.59 | 27.34                          | 88.72   |
| PM <sub>2.5</sub> (µg/m <sup>3</sup> )                              | 14.86   | 16.17                          | 16.56  | 16.58 | 17.04                          | 21.33   |
| PM <sub>2.5</sub> absorbance<br>(10 <sup>-5</sup> m <sup>-1</sup> ) | 0.85    | 1.12                           | 1.23   | 1.26  | 1.37                           | 3.16    |
| PM <sub>10</sub> (µg/m <sup>3</sup> )                               | 23.73   | 23.96                          | 24.44  | 24.77 | 25.15                          | 34.54   |
| Oxidative Potential<br>(nmol DTT/min/m <sup>3</sup> )               | 0.48    | 1.04                           | 1.19   | 1.17  | 1.31                           | 2.09    |

**eTable 2.** Odds Ratios of overall mortality per interquartile range width increase in mean air pollution exposure, evaluated with univariable and multivariable logistic regression models.

| Constituent                  | Univariable models with minimal adjustment <sup>a</sup> |             | Multivariable model with full adjustment <sup>b</sup> |             |       |
|------------------------------|---------------------------------------------------------|-------------|-------------------------------------------------------|-------------|-------|
|                              | OR                                                      | 95%CI       | OR                                                    | 95%CI       | VIF   |
| NO <sub>2</sub>              | 0.98                                                    | (0.90;1.07) | 0.93                                                  | (0.77;1.13) | 5.30  |
| PM <sub>2.5</sub>            | 1.04                                                    | (0.95;1.12) | 1.12                                                  | (0.95;1.32) | 4.04  |
| PM <sub>2.5</sub> absorbance | 1.00                                                    | (0.93;1.07) | 0.80                                                  | (0.59;1.08) | 18.59 |
| PM <sub>10</sub>             | 1.01                                                    | (0.95;1.08) | 1.17                                                  | (0.99;1.38) | 7.21  |
| Oxidative Potential          | 1.03                                                    | (0.94;1.12) | 1.04                                                  | (0.93;1.17) | 1.85  |

<sup>a</sup> Age, sex, BMI, smoking, CVD diagnosis.

<sup>b</sup> Age, sex, BMI, smoking, CVD diagnosis, COPD diagnosis, cancer diagnosis, education, income, normalized difference vegetation index.

BMI=body mass index; CVD=cardiovascular disease; COPD=chronic obstructive pulmonary disease; OR=odds ratio; CI=confidence interval; VIF=variance inflation factor.

**eTable 3.** Odds Ratios of overall mortality per interquartile range width increase in mean air pollution exposure, evaluated with a multivariable logistic regression model using multiple imputation by chained equations for missing values in the exposures.

| Constituent                  | Multivariable model with minimal adjustment <sup>a</sup> |             |       |
|------------------------------|----------------------------------------------------------|-------------|-------|
|                              | OR                                                       | 95%CI       | VIF   |
| NO <sub>2</sub>              | 0.98                                                     | (0.82;1.17) | 5.11  |
| PM <sub>2.5</sub>            | 1.17                                                     | (0.99;1.37) | 4.03  |
| PM <sub>2.5</sub> absorbance | 0.74                                                     | (0.55;0.98) | 18.61 |
| PM <sub>10</sub>             | 1.21                                                     | (1.04;1.42) | 7.23  |
| Oxidative Potential          | 1.07                                                     | (0.96;1.19) | 1.58  |

<sup>a</sup>Age, sex, BMI, smoking, CVD diagnosis.

BMI=body mass index; CVD=cardiovascular disease; OR=odds ratio; CI=confidence interval; VIF=variance inflation factor.

**eTable 4.** Odds Ratios of overall mortality per interquartile range width increase in mean air pollution exposure in a subset of constituents, evaluated with a multivariable logistic regression model.

| Constituent       | Multivariable model with minimal adjustment <sup>a</sup> |             |      |
|-------------------|----------------------------------------------------------|-------------|------|
|                   | OR                                                       | 95%CI       | VIF  |
| NO <sub>2</sub>   | 0.91                                                     | (0.79;1.04) | 2.85 |
| PM <sub>2.5</sub> | 1.03                                                     | (0.94;1.14) | 1.37 |
| PM <sub>10</sub>  | 1.06                                                     | (0.95;1.17) | 3.10 |

<sup>a</sup>Age, sex, BMI, smoking, CVD diagnosis.

BMI=body mass index; CVD=cardiovascular disease; OR=odds ratio; CI=confidence interval; VIF=variance inflation factor.

**eTable 5.** Hazard Ratios of overall mortality per interquartile range width increase in mean air pollution exposure, evaluated with a Cox proportional hazards regression model.

| Constituent                  | Cox model with minimal adjustment <sup>a</sup> |             |
|------------------------------|------------------------------------------------|-------------|
|                              | HR                                             | 95%CI       |
| NO <sub>2</sub>              | 1.00                                           | (0.83;1.20) |
| PM <sub>2.5</sub>            | 1.19                                           | (1.02;1.39) |
| PM <sub>2.5</sub> absorbance | 0.73                                           | (0.55;0.96) |
| PM <sub>10</sub>             | 1.22                                           | (1.05;1.43) |
| Oxidative Potential          | 1.07                                           | (0.97;1.19) |

<sup>a</sup>Age, sex, BMI, smoking, CVD diagnosis.

BMI=body mass index; CVD=cardiovascular disease; HR=hazard ratio; CI=confidence interval.

**eTable 6.** Odds Ratios of overall mortality per interquartile range width increase in mean air pollution exposure, evaluated with univariate and multivariate generalized propensity score models<sup>a</sup> with varying trimming thresholds.

| Constituent         | GPS  |             | mvGPS |             |
|---------------------|------|-------------|-------|-------------|
|                     | OR   | 95%CI       | OR    | 95%CI       |
| Trimming=0.97       |      |             |       |             |
| NO <sub>2</sub>     | 1.12 | (1.03;1.21) | 1.16  | (0.99;1.36) |
| PM <sub>2.5</sub>   | 1.13 | (1.04;1.21) | 1.08  | (0.99;1.19) |
| PM <sub>10</sub>    | 1.10 | (1.04;1.17) | 1.01  | (0.90;1.14) |
| Oxidative Potential | 1.10 | (1.01;1.20) | 1.01  | (0.92;1.11) |
| Trimming=0.95       |      |             |       |             |
| NO <sub>2</sub>     | 1.13 | (1.04;1.22) | 1.16  | (0.99;1.36) |
| PM <sub>2.5</sub>   | 1.13 | (1.05;1.22) | 1.08  | (0.98;1.18) |
| PM <sub>10</sub>    | 1.11 | (1.05;1.18) | 1.00  | (0.88;1.13) |
| Oxidative Potential | 1.11 | (1.02;1.21) | 1.00  | (0.90;1.10) |

<sup>a</sup> PS based on Age, sex, BMI, smoking, CVD diagnosis.

BMI=body mass index; CVD=cardiovascular disease; OR=odds ratio; CI=confidence interval; GPS=generalized propensity score; mvGPS=multivariate generalized propensity score.

**eFigure 1.** Relevance of 2-way interactions (H-statistics) in the overall mixture effect in predicting overall mortality, estimated with boosted regression tree.

|                              | PM <sub>2.5</sub> | PM <sub>2.5</sub> absorbance | PM <sub>10</sub> | Oxidative Potential |
|------------------------------|-------------------|------------------------------|------------------|---------------------|
| NO <sub>2</sub>              | 0.18              | 0.33                         | 0.03             | 0.21                |
| PM <sub>2.5</sub>            | 0                 | 0.2                          | 0.26             |                     |
| PM <sub>2.5</sub> absorbance |                   | 0                            | 0                |                     |
| PM <sub>10</sub>             |                   |                              | 0                |                     |

**eFigure 2.** Relative importance of mixture components in the overall effect of air pollution on overall mortality, estimated with weighted quantile sum.

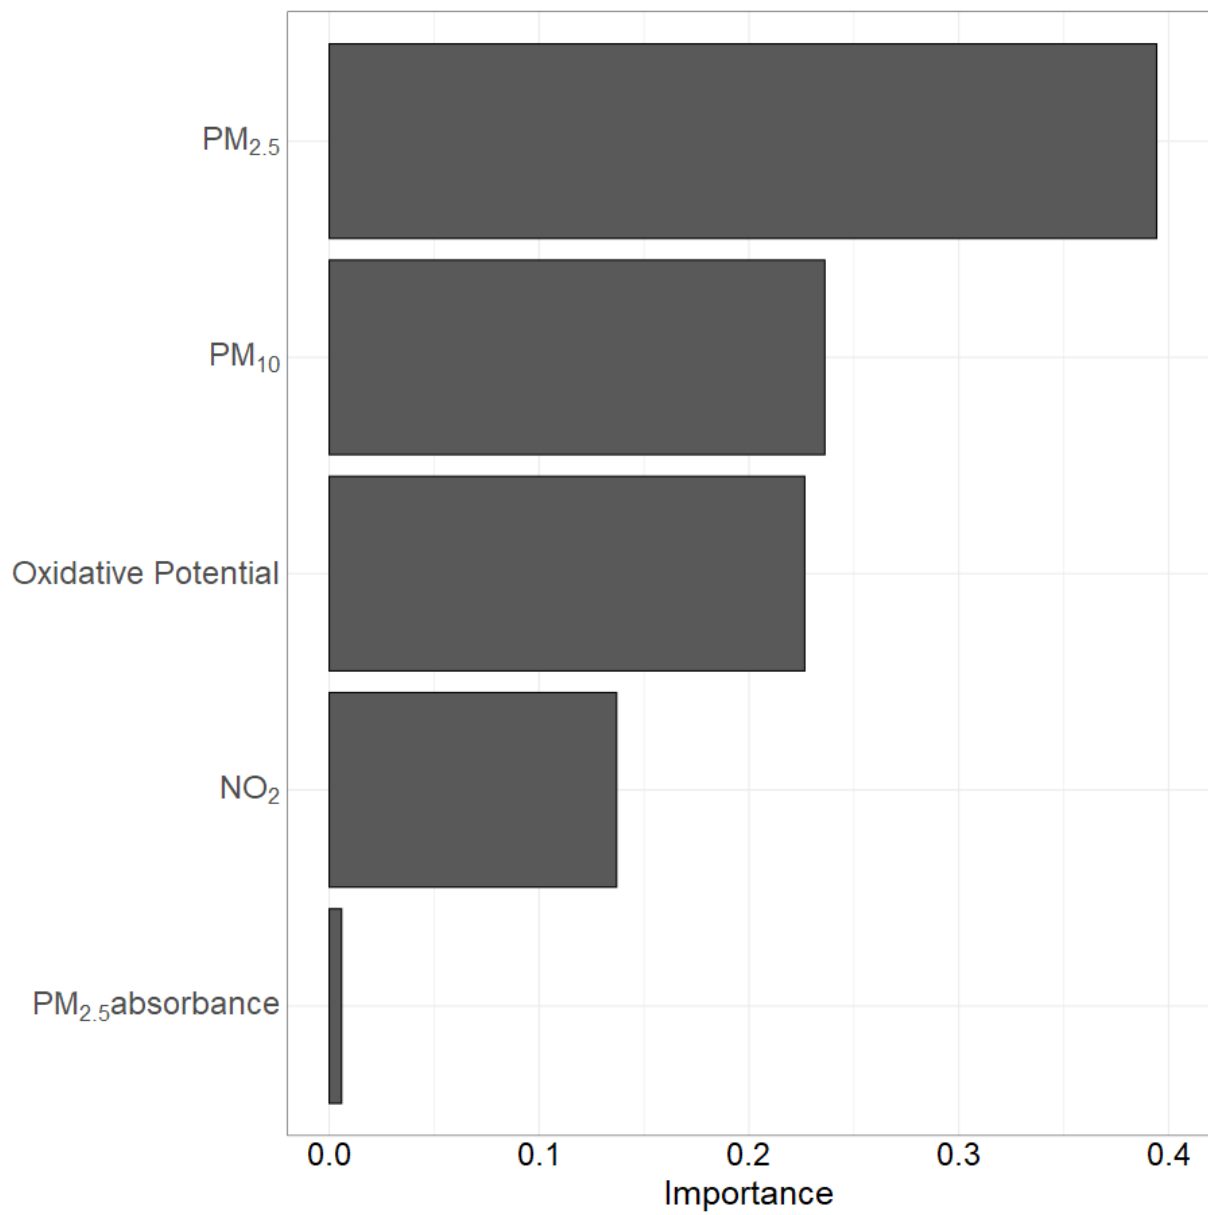



**eFigure 3.** Association between the mixture and overall mortality, estimated with weighted quantile sum.

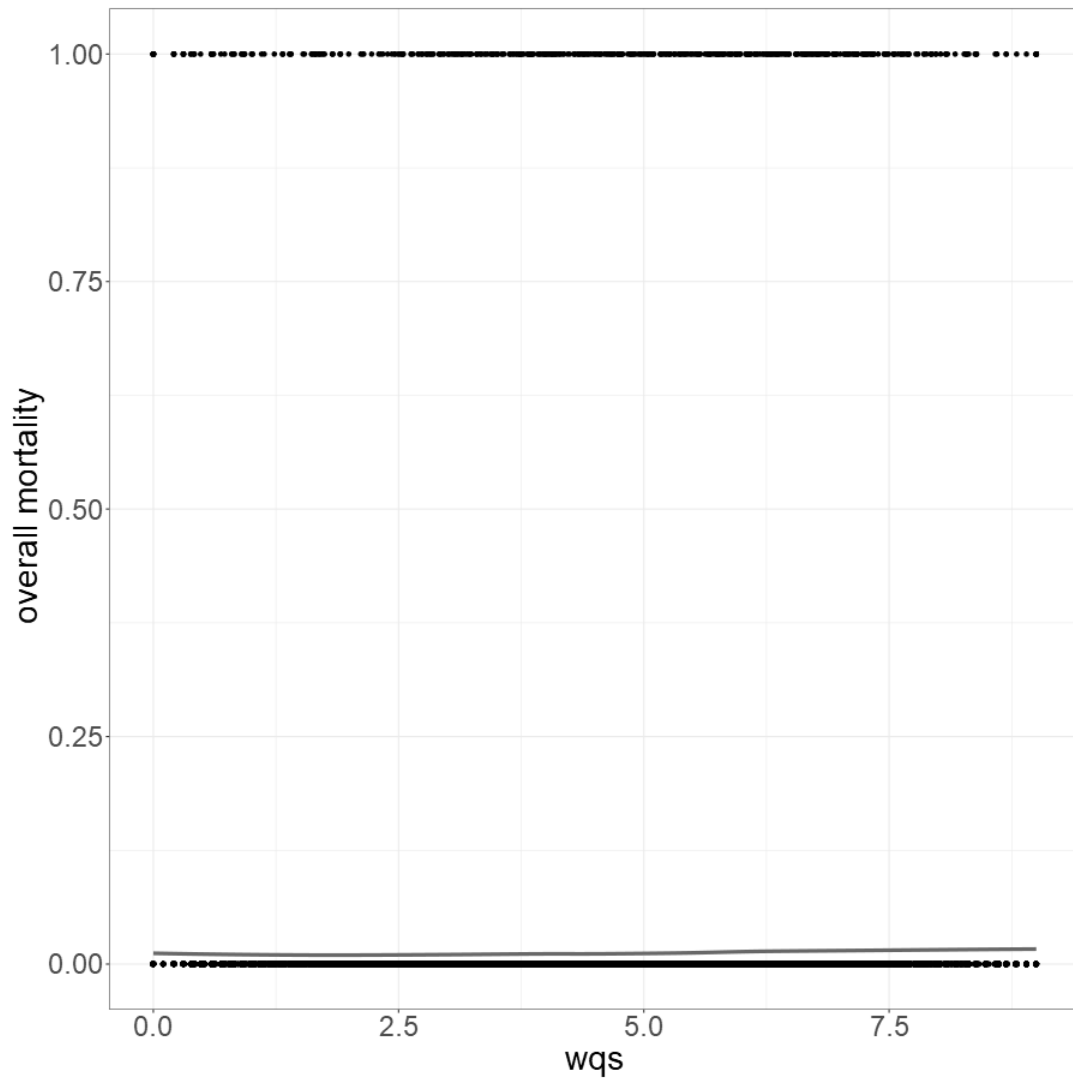

Supplement: ede-33-514-s001.pdf [file ede-33-514-s001.pdf]
